1 **Full title: Evaluating adults' dental caries burden**  
2 **through the DMFT index: results from the Tanzanian**  
3 **5<sup>th</sup> national oral health survey**

4 **Short title: Dental caries in Tanzanian adults**

5 Kasus Nyamuryekung'e<sup>1\*</sup>, Hawa Mbawalla<sup>1</sup>, Matilda Mlangwa<sup>1</sup>

6 <sup>1</sup> Department of Orthodontics, Pedodontics and Community Dentistry, School of  
7 Dentistry, Muhimbili University of Health and Allied Sciences, Dar es Salaam,  
8 Tanzania

9

10 \*Corresponding author

11 [kasusu.nyamuryekunge@muhas.ac.tz](mailto:kasusu.nyamuryekunge@muhas.ac.tz) (KKN)

12

## 13 **Abstract**

### 14 **Aim**

15 Dental caries remains the most prevalent chronic disease worldwide, affecting adults  
16 and children across all regions. The DMFT index, representing the number of  
17 decayed, missing, and filled teeth, serves as a fundamental metric in oral  
18 epidemiology, providing an objective quantification of dental caries prevalence and  
19 severity. The aim of the current study is to evaluate the dental caries burden of the  
20 adult Tanzanian population through the DMFT index.

### 21 **Methods**

22 A national pathfinder survey was conducted in mainland Tanzania using a cross-  
23 sectional design. The survey encompassed fourteen districts across thirteen regions.  
24 Site selection followed the World Health Organization's (WHO) basic oral health  
25 survey methods, utilizing a modified stratified-cluster sampling approach. Electronic  
26 questionnaires were administered to all adult participants prior to their dental  
27 examinations. The questionnaires collected data on participants' sociodemographic  
28 information, tooth brushing practices, and dentition status. Dental examinations were  
29 conducted in accordance with WHO standard criteria. Data cleaning and analysis were  
30 performed using SPSS version 23. Frequencies were calculated to determine the  
31 proportions of participants' mean and separate DMFT (Decayed, Missing, and Filled  
32 Teeth) components. Bivariate associations were examined using Student's t-test and  
33 ANOVA to compare participants' DMFT components with their sociodemographic  
34 characteristics and oral health practices.

## 35 **Results**

36 The study surveyed a total of 1,386 participants aged 30-34, 35-44 and 50+  
37 comprising 713 females (51.4%) with most participants (49.1%) aged 50 years or  
38 older. The mean DMFT in the studied population was 4.63 (SD 5.4) with a dental  
39 caries experience of 76.6%. The Missing teeth component constituted the largest  
40 portion of the mean DMFT (52.4%), followed closely by the Decayed teeth  
41 component (45.8%). Tooth fillings were found in just 3.5% of those with dental caries  
42 experience. The mean DMFT score was significantly higher among females ( $5.31 \pm$   
43  $5.79$ ), those aged 50 or more ( $5.93 \pm 6.26$ ) and with lowest level of education ( $5.78 \pm$   
44  $6.68$ ). Brushing less than once daily ( $p < 0.001$ ), not using toothpaste ( $p < 0.001$ ) and  
45 not using a toothbrush daily ( $p < 0.05$ ) were all associated with increased DMFT  
46 scores.

## 47 **Conclusion**

48 Dental caries is a significant public health issue in Tanzania. The predominance of  
49 missing and decayed teeth highlights the critical gaps in treatment and dental care  
50 service accessibility. There is a pressing need for increased public health investment  
51 in preventive and restorative dental care and enhanced community education on the  
52 importance of maintaining dental health.

53

## 54 Introduction

55 Oral health is a critical component of overall well-being, influencing not only the  
56 physical ability to perform essential functions such as speaking, chewing, and  
57 smiling, but also impacting social interaction and quality of life. It is a significant  
58 determinant of overall health and quality of life, particularly among adults, where the  
59 burden of oral diseases such as dental caries has far-reaching clinical, economic,  
60 and sociodemographic implications. According to the World Health Organization  
61 (WHO), regular national oral health surveys are crucial for gathering data that inform  
62 the planning and implementation of effective oral health services, and for monitoring  
63 trends in oral health across populations(1). These surveys provide essential insights  
64 into the prevalence and impact of oral diseases, which are crucial for global and  
65 regional health comparisons.

66 Dental caries and periodontal diseases remain the most prevalent chronic diseases  
67 worldwide, affecting adults across all regions, including Africa. Dental caries leads to  
68 significant clinical consequences such as pain, discomfort, and functional limitations,  
69 impacting dietary choices and nutritional intake (2). The economic implications are  
70 equally substantial, with high treatment costs and productivity losses due to dental  
71 diseases, straining both individual and public healthcare resources (3). In Sub  
72 Saharan Africa, where access to dental care is limited, the economic burden is  
73 exacerbated by out-of-pocket expenditures, which are prohibitively high for many  
74 households (4,5).

75 The DMFT index, representing the number of decayed, missing, and filled teeth,  
76 serves as a fundamental metric in oral epidemiology. Particularly critical in the  
77 context of Low- and Middle-Income Countries (LMICs), the DMFT index provides an

78 objective quantification of dental caries prevalence and severity. In regions where  
79 resources for health surveillance are often limited, the DMFT index offers a  
80 straightforward, cost-effective means to assess and monitor oral health trends over  
81 time. It highlights the gaps in oral health services and the urgent need for  
82 interventions to address them.

83 The DMFT status of African adults reveals significant challenges in oral health,  
84 characterized by high levels of untreated dental caries and tooth loss, with very few  
85 filled teeth. This trend is largely attributed to limited access to access to preventive  
86 and curative dental services, influenced by both geographic and financial barriers  
87 (6). Studies show that adults from lower socioeconomic backgrounds are more likely  
88 to experience higher DMFT scores, indicating a greater prevalence of untreated  
89 caries and tooth loss (7,8). In rural areas, the lack of dental infrastructure  
90 exacerbates these issues, resulting in higher DMFT scores compared to urban  
91 populations where access to dental services is relatively better (9).

92 In Tanzania, as in many parts of sub-Saharan Africa, oral health issues are often  
93 overlooked in health policy discussions, despite their profound implications on  
94 societal well-being and economic stability. Studies within the region have shown that  
95 dental caries and other oral health conditions disproportionately affect adults in lower  
96 socioeconomic groups, contributing to and exacerbating existing health disparities  
97 (8). Thus, assessment of the DMFT status and its sociodemographic correlates is  
98 essential not only for understanding current health challenges but also for planning  
99 effective preventive and curative strategies tailored to the specific needs of the  
100 population. The aim of the current study is to evaluate the dental caries burden of the  
101 adult Tanzanian population through the DMFT index, providing valuable insights into  
102 the overall impact of dental caries in this setting.

## 103 **Materials and methods**

### 104 **Study design and sites**

105 A national pathfinder survey was conducted in mainland Tanzania, using a cross-  
106 sectional design that encompassed fourteen districts. Sites were selected according  
107 to the World Health Organization’s (WHO) basic oral health survey methods,  
108 employing a modified stratified-cluster sampling approach(1). This methodology  
109 ensures the inclusion of diverse population subgroups representing varying levels of  
110 oral disease. Specifically, our study involved selecting clusters from cosmopolitan  
111 cities, towns, and rural areas. According to the WHO guidelines, a minimum of  
112 twelve sites is recommended, split equally among metropolitan areas, large towns,  
113 and rural settings. For Tanzania, we expanded this number to fourteen to adequately  
114 represent its geographical and demographic diversity.

115 Tanzania's 26 regions are distributed across five administrative zones: northern,  
116 coastal, central, lake, southern highlands, and western. For our study, three  
117 cosmopolitan cities—Dar es Salaam, Arusha, and Mbeya—were purposively chosen  
118 based on their size and geographical importance, contributing a total of four  
119 cosmopolitan clusters. In addition, regions from each zone were selected based on  
120 geographical characteristics and fluoride levels, leading to the inclusion of four  
121 regions (Mara, Kigoma, Tanga, and Mtwara) designated as urban clusters.  
122 Combining these with the cosmopolitan clusters resulted in eight urban clusters.  
123 Additionally, six other regions (Morogoro, Ruvuma, Songwe, Mwanza, Singida, and  
124 Tabora) were designated as rural clusters, each contributing one cluster. Thus, the  
125 final composition of the study included six rural clusters, four urban clusters, and four  
126 cosmopolitan clusters, as detailed in Table 1, which outlines the cluster selection

127 process. Within each district, one ward was randomly selected for inclusion into the  
 128 study.

129 *Table 1: Sampling process for inclusion of participants*

| Zone      | Cluster Type | Regions         | Cities        | Districts/Clusters |
|-----------|--------------|-----------------|---------------|--------------------|
| Northern  | Urban        | Arusha          | Arusha        | Arusha city        |
| Coastal   | Cosmopolitan | Dar es Salaam   | Dar es Salaam | Kinondoni, Ilala   |
|           | Rural        | Morogoro        |               | Kilombero          |
|           | Urban        | Tanga           |               | Tanga              |
| Lake      | Urban        | Mara            |               | Tarime             |
|           | Rural        | Mwanza          |               | Magu               |
| Southern  | Cosmopolitan | Mbeya           | Mbeya         | Mbeya city         |
| Highlands | Rural        | Ruvuma, Songwe  |               | Mbinga, Mbozi      |
|           | Urban        | Mtwara          |               | Mtwara             |
| Central   | Rural        | Singida, Tabora |               | Manyoni, Kaliua    |
| Western   | Urban        | Kigoma          |               | Ujiji              |

130

## 131 **Sample size and sampling process**

132 We structured the sampling process across six rural and eight urban clusters,  
 133 stratified by age and sex in alignment with WHO guidelines. Target adult age groups  
 134 included 30-44, and 50+ years. Following the WHO national pathfinder guidelines,  
 135 we selected streets randomly within designated wards and recruited 100 adults from  
 136 each age bracket—50 from the 30–44-year group and 50 from the 50+ group. We  
 137 continued household visits street by street until achieving the necessary sample size.

## 138 **Variables and data collection tools**

139 We measured all variables in accordance with WHO criteria, focusing on a range of  
140 indicators including socio-demographics, assessment of dental caries, and oral  
141 health practices (1). Data collection was conducted in pairs comprising of a recorder  
142 and examiner. Dental caries was assessed using DMFT criteria and was recorded  
143 using digitized WHO clinical record forms. Interviewer administered questionnaires  
144 were utilized to solicit information on sociodemographic characteristics and oral  
145 health practices. Dental caries examination was performed using mouth mirrors  
146 under natural lighting conditions. Additional equipment included sterilization devices,  
147 storage containers for instruments, gloves, masks, gauze, and refuse bags. During  
148 interviews and examinations, participants were seated on standard chairs.

## 149 **Reliability and validity**

150 We pre-tested all data collection tools to verify their accuracy, logic, and practicality,  
151 including the estimated time required for examining and interviewing participants  
152 across different age groups. All investigators and research assistants underwent a  
153 comprehensive two-day training at the Muhimbili University of Health and Allied  
154 Sciences (MUHAS) Dental School to familiarize themselves with the survey  
155 procedures. To enhance validity, examiners were calibrated against senior clinicians  
156 and participated in exercises to ensure inter- and intra-examiner consistency after  
157 mastering the clinical scoring process.

158 The WHO (2013) oral health questionnaire, already validated in previous studies  
159 including in Tanzania, was translated into Swahili and piloted with 10 adults and 10  
160 children, with only minor modifications made to the wording while preserving the  
161 original meaning. Data collectors received detailed information sheets outlining all  
162 variables and their operational definitions. To maintain data integrity, all collected



163 information was reviewed daily, and each study team included a research supervisor  
164 responsible for monitoring data quality and accuracy.

## 165 **Data collection process**

166 We compiled a list of potential villages and streets for study site selection. A district  
167 dental officer from each cluster assisted, guided, and facilitated access to these  
168 sites. Data collection was carried out by four teams, each consisting of two pairs of  
169 examiners and recorders and one supervisor.

170 All examination instruments were decontaminated using antiseptics, cleaned with  
171 liquid soap, and rinsed with water before being sterilized and stored in clinical drums  
172 for reuse. We adhered to standard aseptic techniques, which included dusting and  
173 disinfecting work surfaces, and the use of gloves and face masks. All used materials  
174 such as gauze, gloves, and masks were disposed of in hospital refuse bags and  
175 incinerated at nearby health facilities.

176 For data collection, electronic questionnaires were administered to all adults prior to  
177 the dental examination. We utilized REDCAP (Research Electronic Data Capture)  
178 software to document both questionnaire responses and clinical data. Research  
179 supervisors from each team regularly reviewed and then uploaded the collected data  
180 to the REDCAP servers of the Muhimbili University of Health and Allied Sciences  
181 (MUHAS). Data was collected for about one month, from 5<sup>th</sup> February to 16<sup>th</sup> March  
182 2020.

## 183 **Data Analysis**

184 Data was transformed to allow computation of sum indices where applicable,  
185 including for DMF-T. All participants that had a DMFT score > 0 was categorised as

186 having dental caries experience. Residence was categorized as either urban, rural,  
187 or cosmopolitan. Frequencies were generated to determine proportions of  
188 participants' mean and separate DMFT components. Bivariate associations using  
189 student's t-test and ANOVA were used to compare participants' DMFT components  
190 with sociodemographic characteristics and oral health practices.

## 191 **Ethical considerations**

192 The study proposal was rigorously reviewed by the WHO and the Borrow Foundation  
193 prior to funding approval. Ethical clearance was obtained from the Muhimbili  
194 University of Health and Allied Sciences (MUHAS) Institutional Review Board. We  
195 also secured the necessary permissions from various authorities, including the Prime  
196 Minister's Office Regional Administration and Local Governments, to access the  
197 study sites. Each study team leveraged the official permission letters to facilitate  
198 discussions with district authorities for site access.

199 To ensure participant privacy, both the questionnaire administration and clinical  
200 examinations were conducted privately, with precautions taken to prevent  
201 overhearing or observation of the procedures by others. We used special coding  
202 instead of participant names to maintain confidentiality. Access to data was strictly  
203 limited to the study team members. Informed consent was obtained from all  
204 participants or their guardians. Verbal consent was obtained from all participants  
205 prior to their inclusion in the study. The ten-cell leader or hamlet chairperson  
206 escorting the research teams to the respective households witnessed the consenting  
207 process. Participants diagnosed with dental diseases or conditions during the study  
208 were advised to seek further care from nearby health facilities.

## 209 **Results**

210 The study enrolled a total of 1,410 adults, however, due to missing and incomplete  
211 data entry, a total of 1,386 participants were included for analysis. Participants had a  
212 nearly even distribution of sex, comprising 673 males (48.6%) and 713 females  
213 (51.4%). Most of the participants (49.1%) were aged 50 years or older, followed by  
214 the age group 35-44 years (30.7%) and 30-34 years (20.2%). A significant portion of  
215 the participants resided in rural areas (43.1%), with the remaining split between  
216 urban (28.0%) and cosmopolitan (28.9%) settings.

217 The education levels of the participants varied, with the majority having completed  
218 primary education (53.0%), while the remainder had either incomplete primary  
219 education (23.7%) or secondary education and above (23.3%). When asked about  
220 their perceived teeth status, most participants (69.3%) reported the status of their  
221 teeth as good, while the remainder reported the status of their teeth as bad (Table  
222 2).

223 *Table 2: Sociodemographic characteristics of the participants (n = 1,386)*

| Variable   | Frequency (%)          |
|------------|------------------------|
| Sex        | Male 673 (48.6)        |
|            | Female 713 (51.4)      |
| Age groups | 30-34 years 280 (20.2) |
|            | 35-44 years 425 (30.7) |
|            | 50+ 681 (49.1)         |
| Residence  | Rural 597 (43.1)       |
|            | Urban 388 (28.0)       |

|                            |                               |            |
|----------------------------|-------------------------------|------------|
|                            | Cosmopolitan                  | 401 (28.9) |
|                            | Incomplete primary education  | 328 (23.7) |
| Education level            | Completed Primary education   | 734 (53.0) |
|                            | Secondary education and above | 324 (23.3) |
| Self-reported teeth status | Good                          | 921 (69.3) |
|                            | Bad                           | 408 (30.7) |

224

225 The mean DMFT in the studied population was 4.63 (SD 5.4). The Missing teeth  
 226 component constituted the largest portion of the mean DMFT (52.4%), followed  
 227 closely by the Decayed teeth component (45.8%). Tooth fillings accounted for only a  
 228 small fraction of the overall DMFT, at 4.8%. Overall, more than three-quarters  
 229 (76.6%) of the population had experienced dental caries (Table 3).

230 *Table 3: Participants mean DMFT and dental caries experience.*

|                                 | Frequency (%) | Mean   | Std.<br>Deviation |
|---------------------------------|---------------|--------|-------------------|
| Decayed teeth                   | 828 (59.7)    | 2.1198 | 2.98880           |
| Filled teeth                    | 52 (3.5)      | .0830  | .52892            |
| Missing teeth                   | 715 (51.6)    | 2.4264 | 4.09781           |
| Dental caries experience (DMFT) | 1,061 (76.6)  | 4.6291 | 5.40166           |

231

232 The sociodemographic characteristics of the participants were analysed in relation to  
 233 the individual components of the DMFT index: decayed, missing, and filled teeth.

234 The mean DMFT score was significantly higher among females (5.31 ± 5.79)

235 compared to males ( $3.91 \pm 4.85$ ) ( $p < 0.001$ ). Females also had higher mean scores  
236 for decayed and missing teeth. The mean DMFT score increased with age, showing  
237 a significant difference across the age groups ( $p < 0.001$ ). Participants aged 50 and  
238 above had the highest mean DMFT score ( $5.93 \pm 6.26$ ).

239 The mean DMFT score was similar across different types of residence, although the  
240 highest score observed among rural residents ( $4.86 \pm 5.51$ ). The mean DMFT score  
241 was significantly higher among participants with incomplete primary education ( $5.78$   
242  $\pm 6.68$ ) and those reporting to have bad teeth status ( $7.04 \pm 6.60$ ) compared to their  
243 counterparts ( $p < 0.001$ ) (Table 4).

244

245 *Table 4: Participants' sociodemographic characteristics by mean DMFT scores and its components (p-values for independent t-*  
 246 *tests and ANOVA).*

|                 |                              | Decayed Mean<br>(SD) | Missing Mean<br>(SD) | Filled Mean (SD) | DMFT Mean (SD)  |
|-----------------|------------------------------|----------------------|----------------------|------------------|-----------------|
| Sex             | Male                         | 1.76 (2.55)          | 2.06 (3.77)          | 0.08 (.54)       | 3.91 (4.85) *** |
|                 | Female                       | 2.46 (3.31)          | 2.77 (4.36)          | 0.08 (.52)       | 5.31 (5.79)     |
| Age groups      | 30-34 years                  | 1.71 (2.69)          | 1.02 (2.12)          | 0.07 (.34)       | 2.80 (3.78) *** |
|                 | 35-44 years                  | 2.07 (3.03)          | 2.60 (2.48)          | 0.09 (.56)       | 3.76 (4.18)     |
|                 | 50+                          | 2.32 (3.07)          | 3.52 (5.11)          | 0.09 (.57)       | 5.93 (6.26)     |
| Residence       | Rural                        | 2.58 (3.31)          | 2.25 (3.96)          | 0.03 (.34)       | 4.86 (5.51)     |
|                 | Urban                        | 1.54 (2.30)          | 2.96 (4.31)          | 0.21 (.80)       | 4.70 (5.28)     |
|                 | Cosmopolitan                 | 2.00 (2.96)          | 2.17 (4.06)          | 0.04 (.53)       | 4.21 (5.35)     |
| Education level | Incomplete primary education | 2.65 (3.39)          | 3.11 (5.25)          | 0.03 (.22)       | 5.78 (6.68) *** |
|                 | Completed Primary education  | 2.11 (3.04)          | 2.22 (3.49)          | 0.03 (.31)       | 4.36 (4.91)     |

|                            |                               |             |             |            |                 |
|----------------------------|-------------------------------|-------------|-------------|------------|-----------------|
|                            | Secondary education and above | 1.60 (2.27) | 2.22 (3.98) | 0.25 (.95) | 4.06 (4.84)     |
|                            | Good                          | 1.71 (2.53) | 1.75 (2.90) | 0.10 (.61) | 3.56 (4.23) *** |
| Self-reported teeth status | Bad                           | 3.10 (3.71) | 3.88 (5.41) | 0.05 (.35) | 7.04 (6.60)     |

247  $P < 0.05^*$ ,  $p < 0.01^{**}$ ,  $p < 0.001^{***}$

248 The participants' tooth brushing practices were analyzed in relation to the individual components of the DMFT index: decayed,  
249 missing, and filled teeth. The mean DMFT score differed significantly across various tooth brushing frequencies ( $p < 0.001$ ).  
250 Participants who brushed less than once daily had the highest mean DMFT score ( $6.83 \pm 7.96$ ), while those who brushed either  
251 once or twice daily had lower mean DMFT scores. Participants who used a toothbrush daily had a significantly lower mean DMFT  
252 score ( $4.47 \pm 5.14$ ) compared to those who did not use a toothbrush daily ( $5.67 \pm 6.98$ ) ( $p < 0.05$ ). Additionally, the mean DMFT  
253 score was significantly lower among participants who used toothpaste daily ( $4.33 \pm 4.96$ ) compared to those who did not use  
254 toothpaste daily ( $6.10 \pm 7.03$ ) ( $p < 0.001$ ). (Table 4).

255

256 Table 5: Participants' tooth brushing practices by mean DMFT scores and its components (*p*-values for independent *t*-tests and  
 257 ANOVA).

|                                |                | Frequency    | Decayed Mean | Missing     | Filled Mean (SD) | DMFT Mean (SD)  |
|--------------------------------|----------------|--------------|--------------|-------------|------------------|-----------------|
|                                |                | (Percentage) | (SD)         | Mean (SD)   |                  |                 |
| Daily tooth brushing frequency | Less than once | 93 (6.7)     | 2.62 (3.30)  | 4.19 (6.88) | 0.01 (.10)       | 6.83 (7.96) *** |
|                                | Once           | 648 (46.8)   | 2.07 (2.93)  | 2.27 (4.00) | 0.04 (.28)       | 4.38 (5.26)     |
|                                | Twice          | 645 (46.5)   | 2.09 (3.00)  | 2.33 (3.57) | 0.14 (.72)       | 5.57 (5.02)     |
| Daily toothbrush use           | Yes            | 1218 (88.3)  | 2.02 (2.92)  | 2.36 (3.84) | 0.90 (.55)       | 4.47 (5.14) *   |
|                                | No             | 161 (11.7)   | 2.80 (3.39)  | 2.84 (5.62) | 0.03 (.39)       | 5.67 (6.98)     |
| Daily toothpaste use           | Yes            | 1153 (83.6)  | 1,96 (2.85)  | 2.27 (3.68) | 0.10 (.58)       | 4.33 (4.96) *** |
|                                | No             | 227 (16.4)   | 2.92 (3.54)  | 3.17 (5.67) | 0.01 (.15)       | 6.10 (7.03)     |

258 *P* < 0.05\*, *p*<0.01\*\*, *p*<0.001\*\*\*





## 260 Discussion

261 This study provides a comprehensive overview of dental health in the Tanzanian  
262 adult population where more than three quarters (76.6%) had dental caries  
263 experience. This reflects a global public health challenge and a substantial dental  
264 caries burden in this setting. This study reveals a mean DMFT (Decayed, Missing,  
265 Filled Teeth) score of 4.63, suggesting a moderate burden of dental diseases. The  
266 distribution within the DMFT components was disproportionately skewed towards  
267 missing and decayed teeth. Significant associations were observed between  
268 sociodemographic characteristics and the DMFT (Decayed, Missing, Filled Teeth)  
269 index, illustrating disparities in dental health across different population segments.

270 The observed prevalence of dental caries experience in this study, at 76.6%, is  
271 particularly high even though in alignment with the global burden of dental diseases,  
272 which remain a major public health challenge. Globally, there has been a decline in  
273 dental caries prevalence in some developed countries due to enhanced preventive  
274 measures with more modest improvements in low-resource settings (10).

275 Nevertheless, current findings remain considerably high even when compared with  
276 other studies from low- and middle-income countries (LMICs). A systematic review  
277 and meta-analysis revealed the overall prevalence of dental caries in East Africa as  
278 45.7%, with Eritrea having the highest prevalence at 65.2% and Tanzania the lowest  
279 at 30.7%. The mean DMFT score for the region is 1.941, with Sudan showing the  
280 highest mean DMFT score at 3.146 and Tanzania the lowest at 0.945 (11) This  
281 difference may indicate varying degrees of public health intervention effectiveness,  
282 differences in dietary habits, fluoride exposure, and access to dental care services  
283 across different contexts. Furthermore, the observed discrepancy of current findings

284 compared to the systematic review are to be expected, due to aggregation of data  
285 from different population groups and settings. The high prevalence of adult dental  
286 caries in our study necessitates integrated preventive and treatment strategies in  
287 dental care, particularly in targeting at-risk populations through community-based  
288 programs and improving the overall oral health infrastructure. These interventions  
289 are critical in reducing the burden of dental caries and should be a priority for health  
290 policymakers.

291 The missing teeth component was the most significant component of the DMFT  
292 index at 52.4%, considerably higher than that found in other low- and middle-income  
293 countries (LMICs), where the range typically varies more broadly. Studies from other  
294 regions in Sub-Saharan Africa and Southeast Asia have reported missing teeth  
295 components ranging from 40% to 55%, suggesting a common trend of high tooth  
296 loss in these region (12,13). Our findings align with trends observed in the Global  
297 Burden of Disease (GBD) study, which highlights tooth loss as a persistent challenge  
298 in regions with healthcare disparities. The significant proportion of missing teeth in  
299 the studied population indicates a pressing need for enhanced dental health  
300 strategies that focus not only on treatment but also on the prevention of initial decay  
301 and the promotion of restorative care over extractions.

302 Decayed teeth constituted a lower but significant portion of the DMFT index at  
303 45.8%, notably higher than global averages (2). This proportion is also higher  
304 compared to similar studies conducted in sub-Saharan Africa (14). Our findings  
305 suggest a considerable gap in effective dental treatment and possible deficiencies in  
306 adequate fluoride exposure, which has been proven to substantially reduce decay  
307 rates (15). The high prevalence of untreated decay in this study indicates barriers to  
308 accessing dental health services, affordability issues, or a lack of public awareness

309 regarding the importance of regular dental care. There is an urgent need for  
310 establishment of enhanced dental health strategies encompassing comprehensive  
311 dental care and preventative measures in this setting.

312 Contrastingly, the filled component of the DMFT was notably low at only 4.8%,  
313 substantially lower than what has been reported in other low- and middle-income  
314 countries (LMICs). Research by Frencken et al. (2017) in LMICs suggests a slightly  
315 higher prevalence of filled teeth, often averaging around 10% to 15% (16). However,  
316 our findings are similar to other studies from parts of Africa where access to dental  
317 care is extremely limited, with reported filled components as low as 2-3% (4), which  
318 highlights the challenges faced in the most resource-constrained settings. The  
319 disparity in the filled component of the DMFT observed in this study highlights the  
320 urgent need for enhanced dental services and preventive care in the studied  
321 population. The significantly low rate of filled teeth not only reflects the lack of access  
322 to restorative dental care but also potentially signifies cultural and socioeconomic  
323 barriers that prevent Tanzanian populations from seeking treatment. Thus, improving  
324 access to dental health services and promoting oral health education remain crucial  
325 for increasing the rate of tooth filling utilization in Tanzania and other similar settings.

326 This study reveals significant associations between sociodemographic  
327 characteristics and the DMFT (Decayed, Missing, Filled Teeth) index, illustrating  
328 disparities in dental health across different population segments. The data indicate  
329 that females had a higher mean DMFT score compared to males, and this difference  
330 was statistically significant. This gender disparity is consistent with other studies  
331 which suggest that biological, behavioural, and cultural factors may contribute to  
332 higher caries prevalence and tooth loss among females (17,18). Moreover, the  
333 progression of DMFT scores with age was expected and aligns with global trends,

334 where older age groups typically exhibit more pronounced dental issues due to  
335 cumulative exposure to caries risk factors and the natural aging process affecting  
336 oral health (19). Participants aged 50 and above displayed the highest mean DMFT  
337 scores, underscoring the need for age-specific dental health interventions and  
338 preventive measures. Interestingly, the analysis revealed no significant variation in  
339 DMFT scores based on types of residence, though rural residents tended to have  
340 slightly higher scores. This could suggest underlying factors like differential access to  
341 dental care services, dietary habits, and fluoride exposure, which are often less  
342 favourable in rural settings (20).

343 Educational level appeared to play a critical role in dental health outcomes.  
344 Participants with incomplete primary education exhibited significantly higher DMFT  
345 scores. Education is a well-documented determinant of health, influencing both  
346 health behaviours and access to healthcare services, including preventive dental  
347 care (21). Lower educational attainment is often associated with inadequate oral  
348 hygiene practices, lower health literacy, and reduced utilization of dental care  
349 services, which could explain the higher DMFT scores observed in this subgroup.  
350 Furthermore, self-reported bad teeth status was strongly associated with higher  
351 DMFT scores. This correlation not only reflects subjective oral health assessments  
352 but also emphasizes the impact of personal oral health perceptions on overall dental  
353 status. Individuals perceiving their dental health as poor might be those experiencing  
354 more severe dental problems, indicative of both the extent and progression of  
355 untreated dental conditions (22)

356 The analysis of toothbrushing practices and their association with the DMFT  
357 (Decayed, Missing, Filled Teeth) index in this study emphasizes the significant  
358 impact of daily oral care routines on dental health outcomes. Participants who

359 engaged in more frequent tooth brushing exhibited substantially lower DMFT scores,  
360 demonstrating the effectiveness of regular dental plaque removal in preventing  
361 dental caries and subsequent tooth loss. This finding is consistent with previous  
362 research that highlights the critical role of tooth brushing frequency as a key  
363 preventive measure against tooth decay. Studies have shown that tooth brushing  
364 performed at least twice daily significantly reduces caries risk, emphasizing the need  
365 for public health initiatives to promote regular brushing habits to maintain dental  
366 health (23). Furthermore, the study found that daily use of a toothbrush and  
367 toothpaste was associated with lower DMFT scores, with participants using fluoride  
368 toothpaste daily exhibiting a notable decrease in their mean DMFT score. This  
369 supports the well-documented benefits of fluoride toothpaste in enhancing tooth  
370 enamel resistance to acid attacks from bacterial metabolism, reinforcing fluoride's  
371 role as a vital preventive agent against dental caries widely recognized in public  
372 health dentistry (24).

373 The presented findings need to be interpreted while acknowledging some of its  
374 limitations. The cross-sectional design of this survey-based study inherently limits its  
375 ability to establish causality between oral hygiene practices and DMFT scores,  
376 capturing only a snapshot in time and restricting insights into the progression of  
377 dental health issues over time. Additionally, the majority of participants being aged  
378 50 years or older (49.1%) might skew results toward dental issues more prevalent in  
379 older adults, potentially limiting the applicability of findings to younger populations.  
380 Furthermore, the reliance on self-reported measures for oral hygiene practices  
381 introduces the risk of bias due to misreporting or memory recall issues, which could  
382 affect the accuracy of the correlations between reported hygiene practices and  
383 actual oral health outcomes. Lastly, while the study controls for several demographic

384 factors, it may not adequately address other confounding variables such as dietary  
385 habits, water fluoridation, and access to dental care, which could significantly  
386 influence DMFT scores and overall oral health, thus potentially biasing the study's  
387 results.

388 Nevertheless, this study employed the WHO pathfinder method to enrol a nationally  
389 representative sample, thereby enhancing the generalizability of the findings to the  
390 broader population and allowing for an accurate reflection of the national status of  
391 oral health, which can effectively inform policy decisions. The use of validated clinical  
392 assessment tools and questionnaires ensured the reliability and validity of the data  
393 collected, minimizing bias and enhancing the accuracy of dental caries and other  
394 dental conditions diagnoses. With a nearly even gender distribution among  
395 participants, the study effectively reflected gender differences in oral health, crucial  
396 for analysing sex-specific outcomes and tailoring health interventions. Additionally,  
397 the inclusion of participants across a wide age range and from diverse geographic  
398 settings—rural, urban, and cosmopolitan—added depth to the analysis of age-  
399 related and environmental factors affecting oral health, supporting a detailed  
400 examination of the impacts of demographic factors on dental health.

## 401 **Conclusions**

402 Dental caries is a significant public health issue in Tanzania. The predominance of  
403 decayed teeth over filled teeth within the caries-experienced group further highlights  
404 the critical gaps in treatment and the need for increased public health investment in  
405 dental care and community education about the importance of maintaining dental  
406 health. There is a clear need for an integrated approach that combines preventive  
407 measures such as increased availability of affordable fluoridated toothpaste and oral

408 health education with improved accessibility to dental services to address this  
409 challenge.

## 410 **Acknowledgements**

411 We extend our sincere gratitude to the Ministry of Health Tanzania, the President's  
412 Office Regional Administration and Local Government, and the Tanzania Dental  
413 Association for their invaluable support and facilitation. Special thanks to the WHO  
414 for reviewing the survey proposal, and to the Regional and District Dental and  
415 Medical Officers who assisted with logistics and data collection. We are also  
416 immensely grateful to all the participants whose cooperation made this study  
417 possible. Sincere appreciation to Dr. Joyce Rose Masalu for her tireless dedication  
418 and unwavering support towards the conduct of the 5<sup>th</sup> Tanzanian National Oral  
419 Health Survey.

420



## 421 **References:**

- 422 1. World Health Organization. Oral Health Surveys Basic Methods 5th Edition  
423 [Internet]. 5th Edition. 2013 [cited 2024 Jun 24]. Available from:  
424 [www.who.int/about/licensing/copyright\\_form/en/index.html](http://www.who.int/about/licensing/copyright_form/en/index.html)
- 425 2. Petersen PE, Ogawa H. The global burden of periodontal disease: towards  
426 integration with chronic disease prevention and control. *Periodontol* 2000.  
427 2012;60(1):15–39.
- 428 3. Listl S, Galloway J, Mossey PA, Marcenes W. Global Economic Impact of  
429 Dental Diseases. *J Dent Res* [Internet]. 2015 Aug 28;94(10):1355–61.  
430 Available from: <https://doi.org/10.1177/0022034515602879>
- 431 4. Chikte U, Pontes CC, Karangwa I, Kimmie-Dhansay F, Erasmus RT, Kengne  
432 AP, et al. Periodontal Disease Status among Adults from South Africa—  
433 Prevalence and Effect of Smoking. *Int J Environ Res Public Health* [Internet].  
434 2019;16(19). Available from: <https://www.mdpi.com/1660-4601/16/19/3662>
- 435 5. Nyamuryekung'e KK, Lahti SM, Tuominen RJ. The relative patient costs and  
436 availability of dental services, materials and equipment in public oral care  
437 facilities in Tanzania. *BMC Oral Health* [Internet]. 2015;15(1):74. Available  
438 from: <https://doi.org/10.1186/s12903-015-0061-3>
- 439 6. Nyamuryekung'e KK, Mlangwa MM, Chaffee BW. Perceived Patient Barriers to  
440 Tooth-Retaining Treatment in Tanzania. *JDR Clin Trans Res* [Internet]. 2022  
441 Sep 21;8(4):374–83. Available from:  
442 <https://doi.org/10.1177/23800844221121262>

- 443 7. Mafuvadze BT, Mahachi L, Mafuvadze B. Dental caries and oral health  
444 practice among 12 year old school children from low socio-economic status  
445 background in Zimbabwe. *Pan Afr Med J* [Internet]. 2013 [cited 2024 May  
446 24];14:164. Available from: </pmc/articles/PMC3696470/>
- 447 8. Ogunbodede EO, Kida IA, Madjapa HS, Amedari M, Ehizele A, Mutave R, et  
448 al. Oral Health Inequalities between Rural and Urban Populations of the  
449 African and Middle East Region. <http://dx.doi.org/10.1177/0022034515575538>  
450 [Internet]. 2015 Jun 22 [cited 2024 May 24];27(1):18–25. Available from:  
451 <https://journals.sagepub.com/doi/abs/10.1177/0022034515575538>
- 452 9. Varenne B, Petersen PE, Fournet F, Msellati P, Gary J, Ouattara S, et al.  
453 Illness-related behaviour and utilization of oral health services among adult  
454 city-dwellers in Burkina Faso: evidence from a household survey. *BMC Health*  
455 *Serv Res* [Internet]. 2006;6:164. Available from:  
456 <http://www.pubmedcentral.nih.gov/articlerender.fcgi?artid=1769368&tool=pmc>  
457 [entrez&rentertype=abstract](http://www.pubmedcentral.nih.gov/articlerender.fcgi?artid=1769368&tool=pmc&rentertype=abstract)
- 458 10. Pitts N, Zero D. White paper on dental caries prevention and management A  
459 summary of the current evidence and the key issues in controlling this  
460 preventable disease. *FDI World Dental Fed*. 2016;
- 461 11. Teshome A, Muche A, Girma B. Prevalence of Dental Caries and Associated  
462 Factors in East Africa, 2000–2020: Systematic Review and Meta-Analysis.  
463 *Front Public Health* [Internet]. 2021 Apr 29 [cited 2024 May 24];9:645091.  
464 Available from: [www.frontiersin.org](http://www.frontiersin.org)

- 465 12. Nguyen L, Häkkinen U, Knuuttila M, Järvelin M. Should we brush twice a day?  
466 Determinants of dental health among young adults in Finland. *Health Econ.*  
467 2008;17(2):267–86.
- 468 13. Kida IA, Åström AN, Strand G V, Masalu JR. Clinical and socio-behavioral  
469 correlates of tooth loss: a study of older adults in Tanzania. *BMC Oral Health.*  
470 2006;6:1–10.
- 471 14. Teshome A, Muche A, Girma B. Prevalence of Dental Caries and Associated  
472 Factors in East Africa, 2000–2020: Systematic Review and Meta-Analysis.  
473 *Front Public Health [Internet].* 2021 Apr 29 [cited 2024 May 24];9:645091.  
474 Available from: [www.frontiersin.org](http://www.frontiersin.org)
- 475 15. G Do L, John Spencer A. Oral health of Australian children: the National child  
476 oral health study 2012–14. University of Adelaide Press; 2016.
- 477 16. Frencken JE, Sharma P, Stenhouse L, Green D, Lavery D, Dietrich T. Global  
478 epidemiology of dental caries and severe periodontitis—a comprehensive  
479 review. *J Clin Periodontol.* 2017;44:S94–105.
- 480 17. Lukacs JR. Gender differences in oral health in South Asia: metadata imply  
481 multifactorial biological and cultural causes. *American Journal of Human*  
482 *Biology.* 2011;23(3):398–411.
- 483 18. Ferraro M, Vieira AR. Explaining gender differences in caries: a multifactorial  
484 approach to a multifactorial disease. *Int J Dent.* 2010;2010.
- 485 19. Griffin SO, Griffin PM, Swann JL, Zlobin N. Estimating rates of new root caries  
486 in older adults. *J Dent Res.* 2004;83(8):634–8.

- 487 20. Vargas CM, Isman RE, Crall JJ. Comparison of Children’s Medical and Dental  
488 Insurance Coverage by Socio demographic Characteristics, United States,  
489 1995. *J Public Health Dent.* 2002;62(1):38–44.
- 490 21. Cutler DM, Lleras-Muney A. Understanding differences in health behaviors by  
491 education. *J Health Econ.* 2010;29(1):1–28.
- 492 22. Riley JL, Gilbert GH, Heft MW. Dental attitudes: Proximal basis for oral health  
493 disparities in adults. *Community Dent Oral Epidemiol.* 2006;34(4):289–98.
- 494 23. Sheiham A, James WPT. Diet and Dental Caries: The Pivotal Role of Free  
495 Sugars Reemphasized. *J Dent Res [Internet].* 2015 Aug 10;94(10):1341–7.  
496 Available from: <https://doi.org/10.1177/0022034515590377>
- 497 24. Marinho VCC, Chong LY, Worthington H V, Walsh T. Fluoride mouthrinses for  
498 preventing dental caries in children and adolescents. *Cochrane database of*  
499 *systematic reviews.* 2016;(7).

500
